# Supplementary material for: Prevalence of Common Diseases in Indigenous People in Colombia
Source: MDPI journal article supplement (doi:10.3390/tropicalmed7060109), 2022-06-18
Supplement: s1 [file s1]

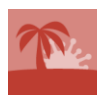

# Supplementary Materials: Prevalence of Common Diseases in Indigenous People in Colombia

Hannah Bauer <sup>1</sup>, Gustavo Andrés Concha Mendoza <sup>2</sup>, Lothar Kreienbrock <sup>3</sup>, Maria Hartmann <sup>3</sup>, Hagen Frickmann <sup>4,5</sup> and Simone Kann <sup>6,\*</sup>

**Table S1.** The number of patients and detected diagnoses in all four Wiwa villages in the collected study data (ST) and the data provided by the brigades (B).

| Village <sup>1</sup> | ST               |                |       |                   |               |       | B                |               |       |                   |               |       |
|----------------------|------------------|----------------|-------|-------------------|---------------|-------|------------------|---------------|-------|-------------------|---------------|-------|
|                      | No. Patients (%) |                |       | No. Diagnoses (%) |               |       | No. Patients (%) |               |       | No. Diagnoses (%) |               |       |
|                      | f <sup>2</sup>   | m <sup>3</sup> | Total | f                 | m             | Total | f                | m             | Total | f                 | m             | Total |
| T                    | 110<br>(55.6)    | 88<br>(44.4)   | 198   | 165<br>(55.9)     | 130<br>(44.1) | 295   | 120<br>(50.8)    | 116<br>(49.2) | 236   | 177<br>(55.1)     | 144<br>(44.9) | 321   |
| S                    | 53<br>(49.1)     | 55<br>(50.9)   | 108   | 70<br>(51.5)      | 66<br>(48.5)  | 136   | 58<br>(59.2)     | 40<br>(40.8)  | 98    | 58<br>(59.2)      | 40<br>(40.8)  | 98    |
| C                    | 31<br>(56.4)     | 24<br>(43.6)   | 55    | 45<br>(57.7)      | 33<br>(42.3)  | 78    | 156<br>(58.2)    | 112<br>(41.8) | 268   | 305<br>(59.0)     | 212<br>(41.0) | 517   |
| A                    | 26<br>(49.1)     | 27<br>(50.9)   | 53    | 32<br>(53.3)      | 28<br>(46.7)  | 60    | 158<br>(47.6)    | 174<br>(52.4) | 332   | 508<br>(58.1)     | 366<br>(41.9) | 874   |
| Total 2              | 220<br>(53.1)    | 194<br>(46.9)  | 414   | 312<br>(54.8)     | 257<br>(45.2) | 569   | 482<br>(52.5)    | 436<br>(47.5) | 918   | 1048<br>(57.9)    | 762<br>(42.1) | 1810  |

<sup>1</sup> T = Tezhumake, S = Seminke, C = Cherua, A = Ashintukwa. <sup>2</sup> Female. <sup>3</sup> Male.

**Table S2.** Diagnoses from the health posts (HP) between 2017 and 2018.

| HP                         | Diagnoses      |      |                |      |         |
|----------------------------|----------------|------|----------------|------|---------|
|                            | f <sup>1</sup> |      | m <sup>2</sup> |      | Total   |
|                            | n              | %    | n              | %    |         |
| Valledupar                 | 50,592         | 65.1 | 27,149         | 34.9 | 77,741  |
| San Juan                   | 12,604         | 64.7 | 6879           | 35.3 | 19,483  |
| Codazzi                    | 11,416         | 62.0 | 6988           | 38.0 | 18,404  |
| Additional Wiwas           | 8671           | 64.9 | 4684           | 35.1 | 13,355  |
| ER <sup>3</sup> Valledupar | 5822           | 63.5 | 3344           | 36.5 | 9166    |
| Becerrill                  | 5191           | 62.2 | 3151           | 37.8 | 8342    |
| La Paz                     | 4112           | 64.2 | 2296           | 35.8 | 6408    |
| Hospitalization            | 663            | 43.7 | 853            | 56.3 | 1516    |
| Total                      | 99,071         | 64.2 | 55,344         | 35.8 | 154,415 |

<sup>1</sup> Male. <sup>2</sup> Female. <sup>3</sup> Emergency room.

**Table S3.** The overall comparison of the ICD chapters in the collected study data (ST) for each village.

| No. of<br>ICD<br>Chapter<br>* | T                                         |         | S                                          |         | C                                          |         | A                                          |         | Overall<br>Ranking |
|-------------------------------|-------------------------------------------|---------|--------------------------------------------|---------|--------------------------------------------|---------|--------------------------------------------|---------|--------------------|
|                               | No. of Dis-<br>eases (% of<br>Population) | Ranking | No. of Dis-<br>eases (% of<br>Population)) | Ranking | No. of Dis-<br>eases (% of<br>Population)) | Ranking | No. of Dis-<br>eases (% of<br>Population)) | Ranking |                    |
| X                             | 138 (55.2)                                | 1       | 53 (34.2)                                  | 1       | 41 (34.2)                                  | 1       | 20 (8.0)                                   | 1       | 1                  |
| I                             | 49 (19.6)                                 | 2       | 43 (27.7)                                  | 2       | 10 (8.3)                                   | 2       | 17 (6.8)                                   | 2       | 2                  |
| XI                            | 19 (7.6)                                  | 4       | 11 (7.1)                                   | 3       | 4 (3.3)                                    | 5       | 3 (1.2)                                    | 4       | 3                  |
| XIV                           | 20 (8.0)                                  | 3       | 6 (3.9)                                    | 4       | 4 (3.3)                                    | 5       | 3 (1.2)                                    | 4       | 4                  |
| XII                           | 15 (6.0)                                  | 5       | 5 (3.2)                                    | 5       | 8 (6.7)                                    | 3       | 2 (0.8)                                    | 5       | 5                  |
| VIII                          | 14 (5.6)                                  | 6       | 4 (2.6)                                    | 6       | 2 (1.7)                                    | 6       | 4 (1.6)                                    | 3       | 6                  |

|                 |          |    |         |   |         |   |         |   |     |
|-----------------|----------|----|---------|---|---------|---|---------|---|-----|
| XIII            | 9 (3.6)  | 7  | 5 (3.2) | 5 | 5 (4.2) | 4 | 3 (1.2) | 4 | 7   |
| XVIII           | 15 (6.0) | 5  |         |   |         |   |         |   | 9   |
| VII             | 6 (2.4)  | 8  | 5 (3.2) | 5 | 2 (1.7) | 6 | 4 (1.6) | 3 | 8   |
| XIX             | 5 (2.0)  | 9  | 3 (1.9) | 7 | 1 (0.8) | 7 | 2 (0.8) | 5 | 10  |
| VI              | 2 (0.8)  | 10 | 1 (0.6) | 8 | 1 (0.8) | 7 | 1 (0.4) | 6 | 11  |
| IV              | 2 (0.8)  | 10 |         |   |         |   | 1 (0.4) | 6 | 12  |
| XV              | 1 (0.4)  | 11 |         |   |         |   |         |   | 13  |
| All diseases    | 295      |    | 136     |   | 78      |   | 60      |   | 569 |
| All patients    | 198      |    | 108     |   | 55      |   | 53      |   | 414 |
| All inhabitants | 250      |    | 155     |   | 120     |   | 250     |   | 775 |

\* I = Certain infectious and parasitic diseases, IV = Endocrine, nutritional and metabolic diseases, VI = Diseases of the nervous system, VII = Diseases of the eye and adnexa, VIII = Diseases of the ear and mastoid process, X = Diseases of the respiratory system, XI = Diseases of the digestive system, XII = Diseases of the skin and subcutaneous tissue, XIII = Diseases of the musculoskeletal system and connective tissue, XIV = Diseases of the genitourinary system, XV = Pregnancy, childbirth and the puerperium, XVIII = Symptoms, signs, and abnormal clinical and laboratory findings, not elsewhere classified, XIX = Injury, poisoning, and certain other consequences of external causes.

**Table S4.** The ranking of number and percentage of all found diagnoses assigned to subchapters of the International Statistical Classification of Diseases and Related Health Conditions (ICD 10) of 2019.

| Number or ICD 10 Subchapter | ICD 10 Subchapter                                                  | Number of Diagnoses | Percentage (%) | Ranking |
|-----------------------------|--------------------------------------------------------------------|---------------------|----------------|---------|
| J00-J06                     | Acute upper respiratory infections                                 | 159                 | 27.9           | 1       |
| J20-J22                     | Other acute lower respiratory infections                           | 60                  | 10.6           | 2       |
| A00-A09                     | Intestinal infectious diseases                                     | 59                  | 10.4           | 3       |
| B65-B83                     | Helminthiasis                                                      | 36                  | 6.3            | 4       |
| K20-K31                     | Diseases of esophagus, stomach and duodenum                        | 34                  | 6.0            | 5       |
| M40-M54                     | Dorsopathies                                                       | 21                  | 3.7            | 6       |
| N30-N39                     | Other diseases of urinary system                                   | 19                  | 3.3            | 7       |
| H65-H75                     | Diseases of middle ear and mastoid                                 | 16                  | 2.8            | 8       |
| B35-B49                     | Mycoses                                                            | 16                  | 2.8            | 8       |
| J09-J18                     | Influenza and pneumonia                                            | 16                  | 2.8            | 8       |
| L00-L08                     | Infections of the skin and subcutaneous tissue                     | 13                  | 2.3            | 9       |
| R50-R69                     | General symptoms and signs                                         | 12                  | 2.1            | 10      |
| H10-H13                     | Disorders of Conjunctiva                                           | 10                  | 1.8            | 11      |
| J30-J39                     | Other diseases of upper respiratory tract                          | 10                  | 1.8            | 11      |
| L40-L45                     | Papulosquamous disorders                                           | 9                   | 1.6            | 12      |
| N70-N77                     | Inflammatory diseases of female pelvic organs                      | 6                   | 1.1            | 13      |
| H15-H22                     | Disorders of sclera, cornea, iris and ciliary body                 | 6                   | 1.1            | 13      |
| L20-L30                     | Dermatitis and eczema                                              | 6                   | 1.1            | 13      |
| B85-B89                     | Pediculosis, ascariasis and other infestations                     | 5                   | 0.9            | 14      |
| J40-J47                     | Chronic lower respiratory diseases                                 | 5                   | 0.9            | 14      |
| H60-H62                     | Diseases of external ear                                           | 5                   | 0.9            | 14      |
| N80-N98                     | Noninflammatory disorders of female genital tract                  | 4                   | 0.7            | 15      |
| H80-H83                     | Diseases of inner ear                                              | 3                   | 0.5            | 16      |
| T20-T32                     | Burns and corrosions                                               | 3                   | 0.5            | 16      |
| K00-K14                     | Diseases of oral cavity, salivary glands, and jaws                 | 2                   | 0.4            | 17      |
| E40-E46                     | Malnutrition                                                       | 2                   | 0.4            | 17      |
| B00-B09                     | Viral infections characterized by skin and mucous membrane lesions | 2                   | 0.4            | 17      |
| J95-J99                     | Other diseases of the respiratory system                           | 2                   | 0.4            | 17      |
| N20-N23                     | Urolithiasis                                                       | 2                   | 0.4            | 17      |
| G50-G59                     | Nerve, nerve root and plexus disorders                             | 2                   | 0.4            | 17      |
| S90-S99                     | Injuries to the ankle and foot                                     | 2                   | 0.4            | 17      |

|         |                                                                     |     |     |    |
|---------|---------------------------------------------------------------------|-----|-----|----|
| L80-L99 | Other disorders of the skin and subcutaneous tissue                 | 2   | 0.4 | 17 |
| N10-N19 | Renal tubulo-interstitial diseases                                  | 1   | 0.2 | 18 |
| O85-O92 | Complications predominantly related to the puerperium               | 1   | 0.2 | 18 |
| M80-M94 | Osteopathies and chondropathies                                     | 1   | 0.2 | 18 |
| S50-S59 | Injuries to the elbow and forearm                                   | 1   | 0.2 | 18 |
| R00-R09 | Symptoms and signs involving the circulatory and respiratory system | 1   | 0.2 | 18 |
| R10-R19 | Symptoms and signs involving the digestive system and abdomen       | 1   | 0.2 | 18 |
| B99-B99 | Other infectious diseases                                           | 1   | 0.2 | 18 |
| K80-K87 | Disorders of the gallbladder, biliary tract, and pancreas           | 1   | 0.2 | 18 |
| N60-N64 | Disorders of the breast                                             | 1   | 0.2 | 18 |
| T08-T14 | Injuries to unspecified part of trunk, limb or body region          | 1   | 0.2 | 18 |
| G80-G83 | Cerebral palsy and other paralytic syndromes                        | 1   | 0.2 | 18 |
| T51-T65 | Toxic effects of substances chiefly nonmedicinal as source          | 1   | 0.2 | 18 |
| G40-G47 | Episodic and paroxysmal disorders                                   | 1   | 0.2 | 18 |
| T15-T19 | Effects of foreign body entering through natural orifice            | 1   | 0.2 | 18 |
| G20-G26 | Extrapyramidal and movement disorders                               | 1   | 0.2 | 18 |
| H00-H06 | Disorders of eyelid, lacrimal system and orbit                      | 1   | 0.2 | 18 |
| S60-S69 | Injuries to the wrist and hand                                      | 1   | 0.2 | 18 |
| R30-R39 | Symptoms and signs involving the urinary system                     | 1   | 0.2 | 18 |
| S20-S29 | Injuries to the thorax                                              | 1   | 0.2 | 18 |
| E65-E68 | Obesity and other hyperalimentation                                 | 1   | 0.2 | 18 |
| Total   |                                                                     | 569 |     |    |

Table S5. The medication list provided by Dusakawi.

| Substance                                   | Dose              | Pharmaceutical Form |
|---------------------------------------------|-------------------|---------------------|
| Acetylsalicylic acid                        | 100 mg            | Tablet              |
| Acyclovir                                   | 200 mg            | Tablet              |
| Adrenaline                                  | 5% 15 g           | Cream               |
|                                             | 1 mg              | Vial                |
| Albendazole                                 | 100 mg/5 mL 20 mL | Suspension          |
|                                             | 200 mg            | Tablet              |
| Allopurinol                                 | 100 mg,           | Tablet              |
|                                             | 300 mg            | Tablet              |
| Alpha methyl dopa                           | 250 mg            | Tablet              |
| Aluminum hydroxide + magnesium + Simeticone | 360 mL            | Suspension          |
| Amantadine                                  | 100 mg            | Capsule             |
| Amikacin                                    | 100 mg            | Vial                |
|                                             | 500 mg            | Vial                |
| Aminophylline                               | 240 mg            | Vial                |
| Amiodarone                                  | 150 mg            | Vial                |
|                                             | 200 mg            | Tablet              |
| Amitriptyline                               | 25 mg             | Tablet              |
| Amlodipine                                  | 5 mg              | Tablet              |
|                                             | 10 mg             | Tablet              |
|                                             | 250 mg/100 mL     | Suspension          |
| Amoxicillin                                 | 500 mg            | Capsule             |
|                                             | 500 mg/100 mL     | Suspension          |
| Ampicillin                                  | 500 mg            | Vial                |
|                                             | 1 g               | Vial                |

|                                                 |                            |                 |
|-------------------------------------------------|----------------------------|-----------------|
|                                                 | 250 mg x 60 mL             | Suspension      |
|                                                 | 500 mg                     | Capsule         |
| Anatoxina tetanica                              | 0.5 mL                     | Vial            |
| Ascorbic acid                                   | 100 mg/mL 30 mL            | Oral drops      |
| Atorvastatin                                    | 500 mg                     | Chewable tablet |
| Atropine (sulfate)                              | 20 mg, 40 mg               | Tablet          |
|                                                 | 1 mg                       | Vial            |
| Azithromycin                                    | 200 mg x 15 mL             | Suspension      |
|                                                 | 500 mg                     | Tablet          |
| Beclomethasone                                  | 50 mcg                     | Nasal inhalator |
|                                                 | 250 mcg                    | Oral inhalator  |
| Benzyl benzoate                                 | 30%                        | Lotion          |
|                                                 | 0.05%                      | Cream           |
| Betamethasone                                   | 3 mg                       | Vial            |
|                                                 | 4 mg                       | Vial            |
|                                                 | 8 mg                       | Vial            |
| Betamethasone + Clotrimazole + Neomycin         | 0.04% + 1% + 0.5 g         | Cream           |
|                                                 | 0.1 mg                     | Tablet          |
| Beta-methyldigoxin                              | 0.6 mg                     | Oral drops      |
|                                                 | 2 mL                       | Vial            |
| Biperiden                                       | 2 mg                       | Tablet          |
| Brimonidine (tartrate)                          | 5 mL                       | Eye drops       |
| Butylscopolamine bromide (Hioszinbutyl bromide) | 10 mg                      | Tablet          |
| Calcium + Vitamin D                             | 600 + 200 IU               | Tablet          |
| Captopril                                       | 25 mg                      | Tablet          |
|                                                 | 50 mg                      | Tablet          |
|                                                 | 2%                         | Oral suspension |
| Carbamazepine                                   | 200 mg                     | Tablet          |
|                                                 | 6.25 mg                    | Tablet          |
| Carvedilol                                      | 12.5 mg                    | Tablet          |
|                                                 | 25 mg                      | Tablet          |
| Cefalexin                                       | 500 mg                     | Capsule         |
|                                                 | 250 mg/5mL                 | Suspension      |
| Cefradine                                       | 500 mg                     | Tablet          |
|                                                 | 1 g                        | Vial            |
| Ceftriaxone                                     | 1 g                        | Vial            |
| Chloroquine                                     | 250 mg                     | Tablet          |
| Chlorphenamine                                  | 2 mg/5 mL 120 mL           | Syrup           |
|                                                 | 4 mg                       | Tablet          |
| Ciprofloxacin                                   | 500 mg                     | Tablet          |
|                                                 | 250 mg                     | Suspension      |
| Clarithromycin                                  | 500 mg                     | Tablet          |
| Clonidine chlorohydrate                         | 150 mg                     | Tablet          |
| Clopidogrel                                     | 75 mg                      | Tablet          |
|                                                 | 1%                         | Topical cream   |
|                                                 | 1%                         | Vaginal cream   |
| Clotrimazole                                    | 100 mg                     | Vaginal tablet  |
|                                                 | 30 mL                      | Lotion          |
| Colchicine                                      | 0.5 mg                     | Tablet          |
| Colistin + Neomycin                             |                            | Ear drops       |
| Conjugated estrogens                            | 0.625 mg                   | Tablet          |
| Cotrimocazole (Trimethoprim + Sulfmethoxazole)  | 160 mg + 800 mg            | Tablet          |
|                                                 | 40 mg + 200 mg/5 mL 120 mL | Suspension      |
|                                                 | 4%                         | Nose drops      |
| Cromoglicate                                    | 4%                         | Eye drops       |
| Crotamiton                                      | 10% x 60 mL                | Lotion          |

|                                                           |                     |                        |
|-----------------------------------------------------------|---------------------|------------------------|
| Dexamethasone                                             | 4 mg                | Vial                   |
|                                                           | 8 mg                | Vial                   |
| Diclofenac                                                | 50 mg               | Tablet                 |
|                                                           | 75 mg               | Vial                   |
| Dicloxacillin                                             | 250 mg x 80 mL      | Suspension             |
|                                                           | 500 mg              | Capsule                |
| Dihydrocodeine                                            | 2.42 120 mL         | Syrup                  |
| Dimenhydrinate                                            | 50 mg               | Tablet                 |
|                                                           | 50 mg               | Capsule                |
| Diphenhydramine                                           | 12.5 mg/5 mL 120 ml | Syrup                  |
|                                                           | 100 mg              | Tablet                 |
| Doxycycline                                               | 100 mg              | Tablet                 |
|                                                           | 5 mg                | Tablet                 |
| Enalapril                                                 | 20 mg               | Tablet                 |
| Ergotamine + Caffeine                                     | 1 mg + 100 mg       | Tablet                 |
| Erythromycin                                              | 500 mg              | Tablet                 |
|                                                           | 250 mg              | Suspension             |
| Esomeprazole                                              | 20 mg               |                        |
|                                                           | 40 mg               | Tablet                 |
| Fluconazole                                               | 200 mg              | Tablet                 |
|                                                           | 50 mg/5 mL 20 ml    | Suspension             |
| Fluoxetine                                                | 20 mg               | Tablet                 |
| Folic acid                                                | 1 mg                | Tablet                 |
| Furosemide                                                | 40 mg               | Tablet                 |
| Gemfibrozil                                               | 600 mg              | Tablet                 |
|                                                           | 0.3%                | Eye drops              |
| Gentamicin                                                | 80 mg               | Vial                   |
| Glibenclamide                                             | 5 mg                | Tablet                 |
| Haloperidol                                               | 5 mg                | Tablet                 |
| Hartmann solution                                         | 500 mL              | Solution for injection |
| Hydrochlorothiazide                                       | 25 mg               | Tablet                 |
|                                                           | 0.5%                | Lotion                 |
| Hydrocortisone                                            | 1%                  | Topical cream          |
|                                                           | 100 mg              | Vial                   |
| Hydrocortisone + Benzocaine                               |                     | Rectal cream           |
| Hydroxyzine                                               | 100 mg              | Vial                   |
| Ibuprofen                                                 | 400 mg              | Tablet                 |
| Ipratropium bromide                                       |                     | Inhalator              |
| Iron fumarate + Folic acid + Ascorbic acid<br>(vitamin c) |                     | Tablet                 |
|                                                           | 125 mg/mL 20 mL     | Oral drops             |
| Iron sulfate                                              | 300 mg              | Tablet                 |
|                                                           | 600 mg/15 mL 120 mL | Syrup                  |
| Isosorbide                                                | 5 mg                | Sublingual tablet      |
| Isosorbide dinitrate                                      | 10 mg               | Tablet                 |
|                                                           | 100 mg 60 mL        | Suspension             |
| Ketoconazole                                              | 200 mg              | Tablet                 |
|                                                           | 1 mg                | Tablet                 |
| Ketotifen                                                 | 1 mg/5 mL x 100 mL  | Syrup                  |
| Levodopa + Carbidopa                                      | 250 mg + 25 mg      | Tablet                 |
|                                                           | 25 mg               | Tablet                 |
| Levomepromazine                                           | 100 mg              | Tablet                 |
|                                                           | 4%                  | Oral drops             |
| Levonorgestrel                                            | 0.03 mg             | Tablet                 |
| Levonorgestrel + Ethinylestradiol                         | 100 mcg + 20 mcg    | Tablet                 |
|                                                           | 25 mcg              | Tablet                 |
| Levothyroxine                                             | 50 mcg              | Tablet                 |

|                                      |                    |                |
|--------------------------------------|--------------------|----------------|
|                                      | 100 mcg            | Tablet         |
|                                      | 125 mcg            | Tablet         |
|                                      | 150 mcg            | Tablet         |
| Lidocaine chlorohydrate              | 2%                 | Gel            |
| Loratadine                           | 5 mg/5 mL x 100 mL | Syrup          |
|                                      | 10 mg              | Tablet         |
| Losartan                             | 50 mg              | Tablet         |
|                                      | 100 mg             | Tablet         |
| Losartan + Hydrochlorothiazide       | 100 mg + 25 mg     | Tablet         |
| Mebendazole                          | 100 mg             | Suspension     |
|                                      | 100 mg             | Tablet         |
| Medroxyprogesterone + Estradiol      | 25 mg + 5 mg       | Vial           |
| Medroxyprogesterone acetate          | 50 mg/mL (5%)      | Vial           |
| Metamizole                           | 1g/2 mL            | Vial           |
|                                      | 2.5 g              | Vial           |
| Metformin                            | 850 mg             | Tablet         |
| Methocarbamol                        | 750 mg             | Tablet         |
| Methotrexate                         | 2.5 mg             | Tablet         |
| Methylprednisolone                   | 500 mg             | Vial           |
| Metoclopramide                       | 10 mg              | Tablet         |
|                                      | 10 mg              | Vial           |
|                                      | 25 mg              | Tablet         |
| Metoprolol succinate                 | 50 mg              | Tablet         |
|                                      | 100 mg             | Tablet         |
|                                      | 50 mg              | Tablet         |
| Metoprolol tartrate                  | 100 mg             | Tablet         |
|                                      | 250 mg/5 mL        | Suspension     |
| Metronidazole                        | 500 mg             | Ovule          |
|                                      | 500 mg             | Tablet         |
| Nalidixic acid                       | 250 mg/120 mL      | Suspension     |
| Naproxen                             | 2.5% 80 mL         | Suspension     |
| Naproxen + Caffeine                  | 220 mg + 50 mg     | Tablet         |
| Neomycin + Polymyxin + Dexamethasone |                    | Eye drops      |
|                                      | 10 mg              | Capsule        |
| Nifedipine                           | 30 mg              | Tablet         |
| Nimodipine                           | 30 mg              | Tablet         |
| Nitrofurantoin                       | 100 mg             | Capsules       |
| Nitrofurazone                        | 500 mg             | Topical cream  |
| Norfloxacin                          | 400 mg             | Tablet         |
|                                      | 100,000 IU         | Suspension     |
| Nystatin                             | 100,000 IU         | Vaginal tablet |
|                                      | 500,000 IU         | Tablet         |
| Nystatin + Zinc oxide                |                    | Topical cream  |
|                                      | 5 mg               | Tablet         |
| Olanzapine                           | 10 mg              | Tablet         |
| Omeprazole                           | 20 mg              | Capsule        |
| Oxacillin                            | 1 g                | Vial           |
| Oxymetazoline                        | 0.25%, 0.05%       | Nasal drops    |
|                                      | 100 mg/mL x 30 mL  | Oral drops     |
| Paracetamol                          | 150 mg/mL x 90 mL  | Syrup          |
|                                      | 500 mg             | Tablet         |
|                                      | 1,000,000 IU       | Vial           |
| Penicillin                           | 1,200,000 IU       | Vial           |
|                                      | 2,400,000 IU       | Vial           |
|                                      | 100 mg             | Tablet         |
| Phenytoin                            | 250 mg/5 mL        | Vial           |
| Physiological serum                  | 500 mL             | Bag            |

|                                 |                     |                  |
|---------------------------------|---------------------|------------------|
|                                 |                     | Nasal drops      |
| Pipotiazine                     | 25 mg/1 mL          | Vial             |
| Potassium chloride              | 10 mL               | Vial             |
| Prednisolone                    | 5 mg                | Tablet           |
| Propranolol                     | 40 mg               | Tablet           |
|                                 | 80 mg               | Tablet           |
|                                 | 250 mg              | Tablet           |
| Pyrantel pamoate                | 250 mg/5 mL x 15 mL | Suspension       |
|                                 | 300 mg              | Tablet           |
| Ranitidine                      | 50 mg               | Vial             |
| Risperidone                     | 1 mg                | Tablet           |
|                                 | 100 mcg             | Inhalator        |
| Salbutamol                      |                     | Salt to nebulize |
|                                 | 2 mg/5 mL 120 mL    | Syrup            |
| Salts for oral rehydration      |                     | Bag              |
| Silver sulfadiazine             | 1%                  | Cream            |
| Sodium chloride                 | 10 mL               | Vial             |
|                                 | 25 mg               | Tablet           |
| Spironolactone                  | 100 mg              | Tablet           |
|                                 | 1 g                 | Tablet           |
| Sucralfate                      |                     | Tablet           |
| Theophylline                    | 125 mg              | Tablet           |
|                                 | 80 mg/15 mL         | Elixir           |
| Timolol maleate                 | 0.5%                | Eye drops        |
| Tinidazole                      | 500 mg              | Tablet           |
|                                 | 100 mg/10 mL        | Oral drops       |
| Tramadol                        | 100 mg/mL           | Vial             |
| Tranexamic acid                 | 500 mg              | Tablet           |
| Trazodone                       | 50 mg               | Tablet           |
| Trimebutine                     | 200 mg              | Tablet           |
|                                 | 250 mg              | Soft capsule     |
| Valproate                       | 250 mg/5 mL 120 mL  | Syrup            |
|                                 | 80 mg               | Tablet           |
| Valsartan                       | 160 mg              | Tablet           |
|                                 | 160 mg + 12.5 mg    | Tablet           |
| Valsartan + Hydrochlorothiazide | 80 mg + 12.5 mg     | Tablet           |
| Vecuronium bromide              | 10 mg               | Vial             |
|                                 | 80 mg               | Tablet           |
| Verapamil                       | 120 mg              | Tablet           |
|                                 | 240 mg              | Tablet           |
| Vitamin A (Retinol)             | 50,000 IU           | Soft capsule     |
|                                 | 10 mL               | Vial             |
| Vitamin B1 (Thiamine)           | 300 mg              | Tablet           |
|                                 | 2 mL                | Vial             |
| Vitamin B12                     |                     | Vial             |
| Vitamin K                       | 10 mg               | Vial             |
| Warfarin sodica                 | 5 mg                | Tablet           |
| Zinc sulfate                    | 2 mg/5 mL 120 mL    | Syrup            |
